# Supplementary material
Source: Royal Society of Chemistry journal article supplement (doi:10.1039/d5em00919g)
Supplement: d5em00919g1.pdf [file d5em00919g1.pdf]

## Supplementary Materials of the Manuscript:

### Predictive Modelling of Pesticide Properties for Risk Assessment: A Curated Dataset and QSAR Evaluation for 110 Active Ingredients

Patricia Bi Asanga Fai<sup>\*a,b,1</sup> and Li Li<sup>b,†</sup>

<sup>a</sup>College of Technology, University of Bamenda, P.O. Box 39 Bambili, Northwest Region, Cameroon.

<sup>b</sup>School of Public Health, University of Nevada Reno, 1664 N. Virginia St., Reno, Nevada 89557-0274, USA

\*Corresponding author: Patricia Bi Asanga Fai, [patriciafai17@gmail.com](mailto:patriciafai17@gmail.com); Tel: +237 676355085; <https://orcid.org/0000-0002-3666-3362>

†Li Li: [lili@unr.edu](mailto:lili@unr.edu)

**Table S1: Literature Derived Values (LDVs) at 25°C for pesticides active ingredients**

| No. | Pesticide active ingredient    | CASRN       | pKa  | log K <sub>OW,neutral</sub> | log K <sub>AW,neutral</sub> | Log K <sub>OA</sub> | Log K <sub>OC</sub> | V <sub>P</sub> (Pa) | S <sub>w</sub> (mol/m <sup>3</sup> ) | Solubility in Octanol (mol/m <sup>3</sup> ) |
|-----|--------------------------------|-------------|------|-----------------------------|-----------------------------|---------------------|---------------------|---------------------|--------------------------------------|---------------------------------------------|
| 1.  | 2,4-Dichlorophenoxyacetic acid | 94-75-7     | 3.4  | 2.81                        | -8.65                       | 11.46               | 1.66                | 1.70E-05            | 3.09E+00                             |                                             |
| 2.  | Abamectin                      | 71751-41-2  | ND   | 4.40                        | -6.94                       | 11.34               | 3.52*               | 2.00E-07            | 6.99E-04                             |                                             |
| 3.  | Acetamiprid                    | 135410-20-7 | 0.7  | 0.74                        | -10.42                      | 11.16               | 2.30                | 1.77E-06            | 1.89E+01                             |                                             |
| 4.  | Alachlor                       | 15972-60-8  | 0.62 | 3.52                        | -5.60                       | 9.12                | 2.28                | 5.48E-03            | 8.90E-01                             |                                             |

<sup>1</sup> Permanent address: Department of Animal Biology, Faculty of Science, University of Dschang, BP 96 Dschang, West Region, Cameroon

<sup>2</sup> The reported value is for avermectin B1a. Abamectin is a mixture composed mainly of avermectin B1a (>80%) and a smaller fraction of avermectin B1b (<20%). Although the two homologues differ only by one CH<sub>2</sub> unit, this structural difference may influence sorption and other physicochemical properties. Here, we use regulatory sorption data reported for avermectin B1a as the best available empirical anchor for abamectin, while noting that component-specific uncertainty remains within the mixture

\* Values inferred from non-linear Freundlich isotherms rather than directly measured linear K<sub>OC</sub> value.

|     |                                            |             |       |      |        |       |       |          |          |          |
|-----|--------------------------------------------|-------------|-------|------|--------|-------|-------|----------|----------|----------|
| 5.  | Aldrin                                     | 309-00-2    | ND    | 6.50 | -1.12  | 7.62  | 4.69  | 1.60E-02 | 8.49E-05 |          |
| 6.  | Ametryn                                    | 834-12-8    | 10.07 | 2.98 | -6.84  | 9.82  | 2.59  | 3.65E-04 | 1.01E+00 |          |
| 7.  | Atrazine                                   | 1912-24-9   | 1.7   | 2.61 | -6.99  | 9.60  | 2.24  | 3.85E-05 | 1.53E-01 |          |
| 8.  | Azoxystrobin                               | 131860-33-8 | ND    | 2.50 | -11.53 | 14.03 | 2.77  | 1.10E-10 | 1.49E-02 |          |
| 9.  | Benalaxyl                                  | 71626-11-4  | ND    | 3.40 | -5.33  | 8.73  | 3.54  | 1.33E-03 | 1.14E-01 |          |
| 10. | Bentazon                                   | 25057-89-0  | 3.51  | 2.34 | -7.20  | 9.54  | 1.52  | 3.24E-04 | 2.08E+00 |          |
| 11. | beta-Hexachlorocyclohexane ( $\beta$ -HCH) | 319-85-7    | ND    | 4.14 | -4.17  | 8.31  | 3.04  | 4.69E-03 | 2.78E-02 |          |
| 12. | Bifenthrin                                 | 82657-04-3  | ND    | 6.00 | -2.45  | 8.45  | 5.35  | 2.40E-05 | 2.71E-06 |          |
| 13. | Bitertanol                                 | 55179-31-2  | ND    | 4.16 | -10.79 | 14.95 | 3.87* | 5.25E-10 | 1.29E-02 | 1.57E+02 |
| 14. | Boscalid                                   | 188425-85-6 | ND    | 2.96 | -7.30  | 10.26 | 3.43* | 1.68E-06 | 1.34E-02 | 2.91E+01 |
| 15. | Brodifacoum                                | 56073-10-0  | ND    | 8.50 | -3.82  | 12.32 | 3.96  | 3.15E-06 | 8.33E-06 |          |
| 16. | Butachlor                                  | 23184-66-9  | ND    | 4.50 | -5.67  | 10.17 | 2.86  | 3.87E-04 | 7.36E-02 |          |
| 17. | Cadusafos                                  | 95465-99-9  | ND    | 3.90 | -4.27  | 8.17  | 2.4*  | 1.20E-01 | 9.06E-01 |          |
| 18. | Captan                                     | 133-06-2    | ND    | 2.80 | -6.54  | 9.34  | 2.30  | 1.20E-05 | 1.70E-02 |          |
| 19. | Carbaryl (1-naphthyl N-methylcarbamate)    | 63-25-2     | 10.4  | 2.36 | -6.87  | 9.23  | 2.40  | 1.81E-04 | 5.47E-01 |          |
| 20. | Carbendazim                                | 10605-21-7  | 4.2   | 1.52 | -9.29  | 10.81 | 2.35  | 1.93E-07 | 1.52E-01 |          |
| 21. | Carbofuran                                 | 1563-66-2   | ND    | 2.32 | -7.39  | 9.71  | 1.75  | 1.47E-04 | 1.45E+00 |          |
| 22. | Chlorothalonil                             | 1897-45-6   | ND    | 2.90 | -5.00  | 7.90  | 3.26  | 7.60E-05 | 3.05E-03 |          |
| 23. | Chlorotoluron                              | 15545-48-9  | ND    | 2.41 | -8.03  | 10.44 | 2.02  | 9.40E-06 | 4.10E-01 |          |
| 24. | Chlorpyrifos                               | 2921-88-2   | ND    | 4.96 | -3.50  | 8.46  | 3.70  | 2.69E-03 | 3.44E-03 |          |
| 25. | Clethodim                                  | 99129-21-2  | 4.47  | 1.44 | -8.83  | 10.27 | 1.72* | 6.34E-05 | 1.74E+01 |          |
| 26. | Cyanazine                                  | 21725-46-2  | 12.9  | 2.22 | -9.61  | 11.83 | 2.28  | 4.32E-07 | 7.06E-01 |          |
| 27. | Cymoxanil                                  | 57966-95-7  | 9.3   | 0.59 | -7.87  | 8.46  | 2.09  | 1.51E-04 | 4.52E+00 |          |
| 28. | Cypermethrin                               | 52315-07-8  | ND    | 6.94 | -4.64  | 11.58 | 5.00  | 1.56E-05 | 2.76E-04 |          |
| 29. | Cyphenothrin                               | 39515-40-7  | ND    | 6.29 | -2.47  | 8.76  | 3.96  | 2.58E-04 | 3.06E-05 |          |
| 30. | DDT (p,p'-DDT)                             | 50-29-3     | ND    | 6.91 | -3.68  | 10.59 | 5.31  | 4.15E-05 | 8.09E-05 |          |
| 31. | Deltamethrin                               | 52918-63-5  | ND    | 6.20 | -3.69  | 9.89  | 7.01  | 2.00E-06 | 3.96E-06 |          |
| 32. | Diazinon                                   | 333-41-5    | 2.6   | 3.81 | -4.67  | 8.48  | 2.75  | 1.20E-02 | 2.26E-01 |          |
| 33. | Dieldrin                                   | 60-57-1     | ND    | 5.20 | -3.34  | 8.54  | 4.08  | 7.41E-04 | 6.56E-04 |          |
| 34. | Difenoconazole                             | 119446-68-3 | 1.07  | 4.30 | -9.44  | 13.74 | 4.15* | 3.33E-08 | 3.69E-02 |          |
| 35. | Dimethoate                                 | 60-51-5     | ND    | 0.78 | -8.00  | 8.78  | 1.20  | 2.51E-03 | 1.02E+02 |          |
| 36. | Dimethomorph                               | 110488-70-5 | -1.3  | 2.68 | -8.50  | 11.18 | 3.18* | 9.85E-07 | 1.27E-01 |          |

|     |                                       |             |      |       |        |       |       |          |          |          |
|-----|---------------------------------------|-------------|------|-------|--------|-------|-------|----------|----------|----------|
| 37. | Diuron                                | 330-54-1    | ND   | 2.68  | -7.69  | 10.37 | 2.4   | 9.20E-06 | 1.80E-01 |          |
| 38. | Emamectin-benzoate                    | 155569-91-8 | 4.2  | 4.94  | -6.08  | 11.02 | 5.58  | 2.86E-05 | 1.38E-02 | 2.40E+01 |
| 39. | Endosulfan                            | 115-29-7    | ND   | 3.83  | -3.27  | 7.10  | 4.09  | 1.48E-03 | 1.11E-03 |          |
| 40. | Endrin                                | 72-20-8     | ND   | 5.20  | -3.39  | 8.59  | 4.08  | 7.24E-04 | 7.23E-04 |          |
| 41. | Epoxiconazole                         | 133855-98-8 | ND   | 3.44  | -7.83  | 11.27 | 3.51* | 7.44E-07 | 2.01E-02 |          |
| 42. | Ethoprophos                           | 13194-48-4  | ND   | 3.59  | -5.18  | 8.77  | 1.85  | 5.07E-02 | 3.10E+00 |          |
| 43. | Fenamiphos                            | 22224-92-6  | ND   | 3.23  | -7.37  | 10.60 | 2.51  | 1.39E-04 | 1.32E+00 |          |
| 44. | Fenbuconazole                         | 114369-43-6 | ND   | 3.23  | -5.15  | 8.38  | 3.65* | 1.05E-05 | 5.94E-04 |          |
| 45. | Fenoxycarb                            | 72490-01-8  | ND   | 4.30  | -7.79  | 12.09 | 3.00  | 8.00E-07 | 1.99E-02 |          |
| 46. | Fenpropimorph                         | 67564-91-4  | 6.98 | 4.93  | -3.79  | 8.72  | 3.44* | 6.64E-03 | 1.63E-02 |          |
| 47. | Fipronil                              | 120068-37-3 | ND   | 4.00  | -7.46  | 11.46 | 3.06* | 3.71E-07 | 4.35E-03 |          |
| 48. | Glufosinate                           | 51276-47-2  | 2    | -4.02 |        |       | 2.78* | 1.21E-09 |          |          |
| 49. | Glyphosate                            | 1071-83-6   | 2.34 | -5.40 | -11.78 | 6.38  | 3.15  | 2.56E-05 | 6.21E+03 |          |
| 50. | Heptachlor                            | 76-44-8     | ND   | 5.47  | -1.35  | 6.82  | 4.38  | 5.33E-02 | 4.82E-04 |          |
| 51. | Hexachlorobenzene                     | 118-74-1    | ND   | 5.73  | -1.31  | 7.04  | 3.74  | 2.29E-03 | 1.89E-05 |          |
| 52. | Hexaconazole                          | 79983-71-4  | 2.3  | 3.84  | -6.62  | 10.46 | 3.02* | 3.94E-05 | 6.57E-02 |          |
| 53. | Hexythiazox                           | 78587-05-0  | ND   | 2.61  | -6.06  | 8.67  | 3.79  | 3.03E-06 | 1.42E-03 |          |
| 54. | Imazalil                              | 35554-44-0  | 6.49 | 3.82  | -6.74  | 10.56 | 3.73  | 3.21E-04 | 7.11E-01 |          |
| 55. | Imidacloprid                          | 138261-41-3 | ND   | 0.57  | -12.66 | 13.23 | 3.14* | 8.05E-10 | 1.49E+00 |          |
| 56. | Indoxacarb                            | 173584-44-6 | ND   | 4.65  | -7.57  | 12.22 | 3.65  | 2.53E-08 | 3.79E-04 |          |
| 57. | Iprodione                             | 36734-19-7  | ND   | 3.00  | -7.98  | 10.98 | 2.85  | 1.10E-06 | 4.21E-02 |          |
| 58. | Isoproturon                           | 34123-59-6  | ND   | 2.87  | -8.38  | 11.25 | 2.89* | 3.29E-06 | 3.15E-01 |          |
| 59. | Lambda-Cyhalothrin                    | 91465-08-6  | ND   | 7.00  | -4.80  | 11.80 | 5.26  | 4.33E-07 | 1.11E-05 |          |
| 60. | Lindane (gamma-hexachlorocyclohexane) | 58-89-9     | ND   | 4.14  | -3.96  | 8.10  | 3.04  | 7.53E-03 | 2.75E-02 |          |
| 61. | Linuron                               | 330-55-2    | ND   | 3.20  | -6.59  | 9.79  | 2.7   | 1.91E-04 | 3.01E-01 |          |
| 62. | Malathion                             | 121-75-5    | ND   | 2.36  | -6.45  | 8.81  | 2.36  | 4.51E-04 | 5.14E-01 |          |
| 63. | Mancozeb                              | 8018-01-7   | 10.3 | 2.24  | -5.83  | 8.07  | 3.00  | 9.62E-05 | 2.62E-02 |          |
| 64. | Maneb                                 | 12427-38-2  | ND   | -0.51 | -7.90  | 7.39  | 3.30  | 2.41E-05 | 7.70E-01 | 5.28E-03 |
| 65. | Mefenoxam (Metalaxyl-M)               | 70630-17-0  | ND   | 1.71  | -7.55  | 9.26  | 1.57  | 6.45E-03 | 9.31E+01 |          |
| 66. | Metalaxyl                             | 57837-19-1  | ND   | 1.71  | -7.41  | 9.12  | 1.57  | 3.31E-03 | 3.45E+01 |          |
| 67. | Metaldehyde                           | 108-62-3    | ND   | 0.22  | -2.68  | 2.90  | 2.38  | 6.60E+00 | 1.26E+00 |          |
| 68. | Methiocarb                            | 2032-65-7   | ND   | 2.92  | -7.01  | 9.93  | 2.32  | 2.89E-05 | 1.20E-01 | 1.38E+02 |

|      |                    |             |       |       |        |       |       |          |          |          |
|------|--------------------|-------------|-------|-------|--------|-------|-------|----------|----------|----------|
| 69.  | Methoxychlor       | 72-43-5     | ND    | 5.08  | -3.65  | 8.73  | 4.90  | 1.61E-04 | 2.89E-04 |          |
| 70.  | Metribuzin         | 21087-64-9  | 1.3   | 1.70  | -8.03  | 9.73  | 1.71  | 1.12E-04 | 4.90E+00 |          |
| 71.  | Metsulfuron-methyl | 74223-64-6  | 3.75  | 2.20  |        |       | 1.54  |          | 8.40E+00 |          |
| 72.  | monocrotophos      | 6923-22-4   | ND    | -0.20 | -10.32 | 10.12 | 1.28  | 5.29E-04 | 4.48E+03 |          |
| 73.  | Nicosulfuron       | 111991-09-4 | 4.78  | 0.01  | -9.50  | 9.51  | 1.4   | 1.40E-05 | 1.78E+01 |          |
| 74.  | Novaluron          | 116714-46-6 | ND    | 5.27  | -3.86  | 9.13  | 3.98  | 3.67E-05 | 1.08E-04 |          |
| 75.  | o,p'-DDT           | 789-02-6    | ND    |       | -3.52  |       | 5.18  | 1.80E-04 | 2.40E-04 |          |
| 76.  | Oxadiazon          | 19666-30-9  | ND    | 4.80  | -5.34  | 10.14 | 3.51  | 2.30E-05 | 2.03E-03 |          |
| 77.  | Oxamyl             | 23135-22-0  | -2.11 | -0.47 | -8.01  | 7.54  | 1.00  | 3.07E-02 | 1.28E+03 |          |
| 78.  | p,p'-DDD           | 72-54-8     | ND    | 6.02  | -3.59  | 9.61  | 4.70  | 1.80E-04 | 2.81E-04 |          |
| 79.  | p,p'-DDE           | 72-55-9     | ND    | 6.51  | -2.59  | 9.10  | 4.82  | 8.00E-04 | 1.27E-04 |          |
| 80.  | Paraquat           | 4685-14-7   | ND    | -4.22 | -11.77 | 7.55  | 6     | 1.40E-05 | 3.33E+03 |          |
| 81.  | Penconazole        | 66246-88-6  | 1.51  | 3.66  | -6.24  | 9.90  | 4.08* | 3.71E-04 | 2.57E-01 |          |
| 82.  | Pendimethalin      | 40487-42-1  | 2.8   | 5.20  | -3.17  | 8.37  | 3.7   | 1.95E-03 | 1.17E-03 | 2.35E+02 |
| 83.  | Pirimicarb         | 23103-98-2  | 4.4   | 1.70  | -7.46  | 9.16  | 1.90  | 9.71E-04 | 1.13E+01 |          |
| 84.  | Pirimiphos-methyl  | 29232-93-7  | 4.3   | 4.20  | -4.43  | 8.63  | 3.00  | 3.82E-03 | 4.13E-02 |          |
| 85.  | Prochloraz         | 67747-09-5  | 3.8   | 4.10  | -6.17  | 10.27 | 3.25  | 1.51E-04 | 9.03E-02 |          |
| 86.  | Propanil           | 709-98-8    | 19.1  | 3.07  | -7.15  | 10.22 | 2.17  | 1.21E-04 | 6.97E-01 |          |
| 87.  | Propazine          | 139-40-2    | 1.7   | 2.93  | -6.73  | 9.66  | 2.40  | 1.75E-05 | 3.74E-02 |          |
| 88.  | Propiconazole      | 60207-90-1  | 1.09  | 3.72  | -7.15  | 10.87 | 3.39  | 5.60E-05 | 3.21E-01 |          |
| 89.  | Propoxur           | 114-26-1    | ND    | 1.52  | -6.90  | 8.42  | 1.67  | 2.80E-03 | 8.89E+00 |          |
| 90.  | Pyraclostrobin     | 175013-18-0 | ND    | 3.99  | -8.34  | 12.33 | 3.97  | 6.36E-08 | 5.62E-03 | 6.24E+01 |
| 91.  | Pyrimethanil       | 53112-28-0  | 3.52  | 2.84  | -5.84  | 8.68  | 3.1*  | 2.20E-03 | 6.07E-01 |          |
| 92.  | Simazine           | 122-34-9    | 1.62  | 2.18  | -7.41  | 9.59  | 2.10  | 2.95E-06 | 3.07E-02 |          |
| 93.  | Spiroxamine        | 118134-30-8 | 6.9   | 2.83  | -5.36  | 8.19  | 4.88* | 1.71E-02 | 1.58E+00 |          |
| 94.  | Tebuconazole       | 107534-96-3 | 5     | 3.70  | -7.95  | 11.65 | 3.53* | 3.78E-06 | 1.34E-01 | 3.12E+02 |
| 95.  | Tebufenozide       | 112410-23-8 | ND    | 4.25  | -6.29  | 10.54 | 2.74* | 3.00E-06 | 2.35E-03 |          |
| 96.  | Tebuthiuron        | 34014-18-1  | ND    | 1.79  | -8.83  | 10.62 | 1.83  | 4.00E-05 | 1.10E+01 |          |
| 97.  | Terbutylazine      | 5915-41-3   | 1.9   | 3.40  | -6.03  | 9.43  | 2.32  | 9.00E-05 | 3.92E-02 | 5.22E+01 |
| 98.  | Terbutryn          | 886-50-0    | 4.3   | 3.74  | -6.06  | 9.80  | 2.85  | 2.25E-04 | 1.04E-01 | 5.39E+02 |
| 99.  | Thiabendazole      | 148-79-8    | 4.73  | 2.47  | -9.06  | 11.53 | 3.24  | 5.33E-07 | 2.48E-01 |          |
| 100. | Thiacloprid        | 111988-49-9 | ND    | 1.20  | -12.47 | 13.67 | 3.29* | 6.18E-10 | 7.32E-01 |          |

|      |                      |             |      |       |        |       |       |          |          |  |
|------|----------------------|-------------|------|-------|--------|-------|-------|----------|----------|--|
| 101. | Thiamethoxam         | 153719-23-4 | ND   | -0.13 | -12.72 | 12.59 | 1.75  | 6.60E-09 | 1.41E+01 |  |
| 102. | Thifensulfuron       | 79277-67-1  | ND   |       |        |       | 1.9*  |          |          |  |
| 103. | Thiophanate-methyl   | 23564-05-8  | 7.28 | 1.40  | -7.31  | 8.71  | 3.25  | 9.51E-06 | 7.77E-02 |  |
| 104. | Thiram               | 137-26-8    | 8.19 | 1.73  | -5.13  | 6.86  | 2.83  | 2.29E-03 | 1.25E-01 |  |
| 105. | Triadimenol          | 55219-65-3  | ND   | 3.08  | -8.72  | 11.80 | 2.7   | 1.32E-06 | 2.79E-01 |  |
| 106. | Triazophos           | 24017-47-8  | ND   | 3.34  | -6.19  | 9.53  | 2.55  | 1.97E-04 | 1.24E-01 |  |
| 107. | Triclopyr            | 55335-06-3  | 3.97 | -0.51 | -7.40  | 6.89  | 1.67  | 1.68E-04 | 1.72E+00 |  |
| 108. | Trifloxystrobin      | 141517-21-7 | ND   | 4.50  | -6.04  | 10.54 | 3.52* | 3.40E-06 | 1.49E-03 |  |
| 109. | $\alpha$ -Endosulfan | 959-98-8    | ND   | 4.68  | -3.16  | 7.84  | 4.06  | 1.57E-03 | 9.03E-04 |  |
| 110. | $\beta$ -Endosulfan  | 33213-65-9  | ND   | 3.77  |        |       |       |          | 1.27E-03 |  |

**Table S2: Pesticides categories based on the reliability and overall availability of physicochemical properties data**

| S/N                                                                                    | Active ingredient | Difference between Consensus Predicted Values (CPVs) and Final Adjusted Values (FAVs) |                        |                        |                        |                             |            |
|----------------------------------------------------------------------------------------|-------------------|---------------------------------------------------------------------------------------|------------------------|------------------------|------------------------|-----------------------------|------------|
|                                                                                        |                   | Log<br>K <sub>AW</sub>                                                                | Log<br>K <sub>OA</sub> | Log<br>K <sub>OW</sub> | Log<br>K <sub>OC</sub> | WS<br>(mol/m <sup>3</sup> ) | VP<br>(Pa) |
| <b>CATEGORY 1 (High data availability; high data reliability) – 27 % of pesticides</b> |                   |                                                                                       |                        |                        |                        |                             |            |
| 1                                                                                      | Alachlor          | 0.09                                                                                  | 0.00                   | 0.13                   | 0.04                   | 0.431                       | 0.210      |
| 2                                                                                      | Ametryn           | 0.08                                                                                  | 0.39                   | 0.09                   | 0.14                   | 0.009                       | 0.608      |
| 3                                                                                      | Bentazon          | 0.74                                                                                  | 0.30                   | 0.44                   | 0.28                   | 0.319                       | 0.443      |
| 4                                                                                      | Butachlor         | 0.03                                                                                  | 0.34                   | 0.12                   | 0.19                   | 0.336                       | 0.130      |
| 5                                                                                      | Cadusafos         | 0.19                                                                                  | 0.18                   | 0.20                   | 0.03                   | 0.36                        | 0.46       |
| 6                                                                                      | Carbofuran        | 0.14                                                                                  | 0.05                   | 0.20                   | 0.11                   | 0.006                       | 0.845      |
| 7                                                                                      | DDT (p,p'-DDT)    | 0.03                                                                                  | 0.22                   | 0.10                   | 0.08                   | 0.978                       | 0.377      |
| 8                                                                                      | Diazinon          | 0.30                                                                                  | 0.58                   | 0.20                   | 0.11                   | 0.618                       | 0.041      |
| 9                                                                                      | Dimethoate        | 0.20                                                                                  | 0.57                   | 0.05                   | 0.33                   | 0.048                       | 0.013      |
| 10                                                                                     | Endrin            | 0.78                                                                                  | 0.00                   | 0.14                   | 0.35                   | 0.594                       | 0.702      |
| 11                                                                                     | Ethoprophos       | 0.14                                                                                  | 0.07                   | 0.42                   | 0.13                   | 0.469                       | 0.137      |
| 12                                                                                     | Fenamiphos        | 0.33                                                                                  | 0.39                   | 0.08                   | 0.04                   | 0.465                       | 0.079      |
| 13                                                                                     | Heptachlor        | 0.25                                                                                  | 0.38                   | 0.46                   | 0.20                   | 0.592                       | 0.736      |
| 14                                                                                     | Imazalil          | 0.54                                                                                  | 0.38                   | 0.32                   | 0.10                   | 0.272                       | 0.317      |
| 15                                                                                     | Linuron           | 0.03                                                                                  | 0.07                   | 0.07                   | 0.18                   | 0.255                       | 0.665      |
| 16                                                                                     | Malathion         | 0.50                                                                                  | 0.38                   | 0.25                   | 0.56                   | 0.031                       | 0.665      |

|                                                                                                |                         |      |      |      |      |       |       |
|------------------------------------------------------------------------------------------------|-------------------------|------|------|------|------|-------|-------|
| 17                                                                                             | Mefenoxam (Metalaxyl-M) | 0.52 | 0.30 | 0.05 | 0.26 | 0.260 | 0.95  |
| 18                                                                                             | Metalaxyl               | 0.52 | 0.30 | 0.05 | 0.26 | 0.260 | 0.95  |
| 19                                                                                             | Oxadiazon               | 0.06 | 0.47 | 0.00 | 0.11 | 0.459 | 0.04  |
| 20                                                                                             | Oxamyl                  | 0.42 | 0.85 | 0.17 | 0.00 | 0.427 | 0.76  |
| 21                                                                                             | p,p'-DDD                | 0.58 | 0.20 | 0.22 | 0.21 | 0.964 | 0.319 |
| 22                                                                                             | p,p'-DDE                | 0.04 | 0.07 | 0.14 | 0.43 | 0.768 | 0.090 |
| 23                                                                                             | Pirimicarb              | 0.43 | 0.27 | 0.07 | 0.32 | 0.147 | 0.590 |
| 24                                                                                             | Propiconazole           | 0.19 | 0.32 | 0.18 | 0.09 | 0.405 | 0.51  |
| 25                                                                                             | Propoxur                | 0.14 | 0.40 | 0.28 | 0.05 | 0.158 | 0.60  |
| 26                                                                                             | Pyrimethanil            | 0.92 | 0.86 | 0.07 | 0.58 | 0.43  | 0.69  |
| 27                                                                                             | Tebuconazole            | 0.07 | 0.51 | 0.07 | 0.63 | 0.13  | 0.31  |
| 28                                                                                             | Tebuthiuron             | 0.45 | 0.12 | 0.13 | 0.37 | 0.369 | 0.335 |
| 29                                                                                             | Terbutryn               | 0.27 | 0.34 | 0.08 | 0.09 | 0.221 | 0.548 |
| 30                                                                                             | Triadimenol             | 0.70 | 1.00 | 0.07 | 0.24 | 0.297 | 0.370 |
| <b>CATEGORY 2 (High data availability; low reliability for some data) – 69 % of pesticides</b> |                         |      |      |      |      |       |       |
| 1                                                                                              | Abamectin               | 3.41 | 1.92 | 1.94 | 1.44 | 2.46  | 14.44 |
| 2                                                                                              | Hexythiazox             | 0.45 | 5.11 | 5.65 | 0.45 | 0.543 | 1.38  |
| 3                                                                                              | monocrotophos           | 0.34 | 0.62 | 0.40 | 0.90 | 1.021 | 0.31  |
| 4                                                                                              | Methiocarb              | 0.14 | 0.23 | 0.33 | 0.06 | 0.749 | 1.36  |
| 5                                                                                              | Triazophos              | 1.10 | 0.33 | 0.34 | 0.24 | 0.507 | 0.37  |
| 6                                                                                              | Dimethomorph            | 2.24 | 0.27 | 0.34 | 0.40 | 0.04  | 1.04  |
| 7                                                                                              | Azoxystrobin            | 0.03 | 1.18 | 0.09 | 0.25 | 1.327 | 1.31  |
| 8                                                                                              | Epoxiconazole           | 0.66 | 0.95 | 0.06 | 0.46 | 0.55  | 1.54  |
| 9                                                                                              | Thiabendazole           | 2.29 | 0.73 | 0.11 | 0.19 | 0.883 | 0.57  |

|    |                                |      |      |      |      |       |      |
|----|--------------------------------|------|------|------|------|-------|------|
| 10 | Carbendazim                    | 0.52 | 1.15 | 0.04 | 0.37 | 1.751 | 1.19 |
| 11 | Bitertanol                     | 1.17 | 2.09 | 0.05 | 0.65 | 0.59  | 2.87 |
| 12 | Benalaxyl                      | 1.54 | 1.38 | 0.55 | 0.25 | 0.246 | 1.12 |
| 13 | Difenoconazole                 | 2.57 | 1.04 | 0.01 | 0.84 | 0.21  | 0.08 |
| 14 | Mancozeb                       | 2.45 | 1.50 | 1.16 | 0.25 | 5.476 | 0.04 |
| 15 | Iprodione                      | 1.86 | 0.19 | 0.68 | 0.56 | 0.811 | 1.00 |
| 16 | Prochloraz                     | 1.68 | 0.78 | 0.86 | 0.75 | 0.294 | 1.68 |
| 17 | Maneb                          | 0.56 | 0.34 | 0.76 | 0.55 | 3.540 | 1.11 |
| 18 | Fenpropimorph                  | 0.92 | 0.05 | 0.19 | 0.19 | 0.57  | 1.11 |
| 19 | Chlorothalonil                 | 0.34 | 0.30 | 0.40 | 0.20 | 1.231 | 0.68 |
| 20 | Hexachlorobenzene              | 0.21 | 0.13 | 0.04 | 0.36 | 0.514 | 1.05 |
| 21 | Captan                         | 0.11 | 0.26 | 0.65 | 0.57 | 1.762 | 0.16 |
| 22 | Boscalid                       | 1.13 | 0.84 | 1.27 | 0.32 | 0.40  | 0.95 |
| 23 | Spiroxamine                    | 0.09 | 5.43 | 5.06 | 1.57 | 1.29  | 0.48 |
| 24 | Pyraclostrobin                 | 2.46 | 0.32 | 0.68 | 0.15 | 0.526 | 0.88 |
| 25 | Trifloxystrobin                | 0.56 | 0.49 | 1.29 | 1.60 | 0.14  | 1.60 |
| 26 | Thiophanate-methyl             | 1.89 | 0.36 | 0.23 | 0.90 | 1.639 | 0.76 |
| 27 | Fenbuconazole                  | 2.70 | 0.81 | 0.66 | 0.04 | 1.23  | 1.03 |
| 28 | Hexaconazole                   | 0.71 | 0.09 | 0.04 | 0.11 | 0.03  | 1.01 |
| 29 | Penconazole                    | 1.11 | 4.41 | 5.01 | 0.80 | 0.67  | 0.19 |
| 30 | Cymoxanil                      | 0.01 | 0.14 | 1.35 | 0.47 | 1.410 | 0.06 |
| 31 | Thiram                         | 1.21 | 0.26 | 0.01 | 0.56 | 1.445 | 0.55 |
| 32 | Propanil                       | 0.65 | 0.58 | 0.01 | 0.11 | 0.128 | 1.03 |
| 33 | 2,4-Dichlorophenoxyacetic acid | 2.59 | 2.60 | 0.23 | 0.09 | 0.435 | 1.65 |

|    |                                         |      |      |      |      |       |       |
|----|-----------------------------------------|------|------|------|------|-------|-------|
| 34 | Diuron                                  | 0.02 | 0.19 | 0.11 | 0.21 | 0.771 | 1.12  |
| 35 | Paraquat                                | 2.62 | 2.65 | 4.50 | 3.82 | 1.004 | 3.53  |
| 36 | Clethodim                               | 1.36 | 4.96 | 7.08 | 1.65 | 2.13  | 1.26  |
| 37 | Pendimethalin                           | 1.18 | 0.91 | 0.21 | 0.00 | 0.458 | 0.25  |
| 38 | Terbuthylazine                          | 0.24 | 0.51 | 0.24 | 0.01 | 0.787 | 1.07  |
| 39 | Chlorotoluron                           | 0.27 | 0.34 | 0.12 | 0.08 | 0.682 | 1.34  |
| 40 | Glyphosate                              | 2.55 | 1.26 | 2.21 | 1.49 | 0.944 | 0.59  |
| 41 | Triclopyr                               | 0.85 | 2.51 | 4.77 | 0.03 | 0.539 | 0.63  |
| 42 | Nicosulfuron                            | 5.04 | 4.89 | 0.33 | 0.66 | 1.110 | 5.67  |
| 43 | Atrazine                                | 0.15 | 0.61 | 0.15 | 0.22 | 1.033 | 1.34  |
| 44 | Cyanazine                               | 1.15 | 1.57 | 0.21 | 0.44 | 0.659 | 2.49  |
| 45 | Metribuzin                              | 0.93 | 1.17 | 0.03 | 0.27 | 0.599 | 0.45  |
| 46 | Propazine                               | 0.14 | 0.62 | 0.06 | 0.16 | 1.116 | 1.28  |
| 47 | Simazine                                | 0.16 | 0.62 | 0.17 | 0.31 | 1.814 | 2.05  |
| 48 | Isoproturon                             | 0.02 | 0.72 | 0.20 | 0.85 | 0.66  | 1.18  |
| 49 | Chlorpyrifos                            | 0.19 | 1.01 | 0.08 | 0.01 | 0.150 | 0.222 |
| 50 | Novaluron                               | 5.88 | 3.88 | 0.29 | 0.08 | 0.344 | 2.34  |
| 51 | Carbaryl (1-naphthyl N-methylcarbamate) | 0.00 | 0.05 | 0.09 | 0.15 | 0.741 | 1.04  |
| 52 | Fenoxycarb                              | 0.67 | 0.60 | 0.11 | 0.42 | 0.009 | 1.33  |
| 53 | Tebufenozide                            | 1.72 | 0.05 | 0.98 | 0.85 | 0.07  | 1.76  |
| 54 | Thiacloprid                             | 5.20 | 2.17 | 0.63 | 0.90 | 0.63  | 4.98  |
| 55 | Thiamethoxam                            | 3.16 | 2.61 | 0.56 | 0.50 | 0.842 | 4.28  |
| 56 | Acetamiprid                             | 4.53 | 4.11 | 1.20 | 0.22 | 0.290 | 3.67  |
| 57 | Imidacloprid                            | 3.37 | 2.44 | 0.03 | 1.45 | 1.64  | 5.37  |

|                                                                              |                                            |       |      |      |      |       |       |
|------------------------------------------------------------------------------|--------------------------------------------|-------|------|------|------|-------|-------|
| 58                                                                           | Aldrin                                     | 0.03  | 0.28 | 0.01 | 0.12 | 1.378 | 1.16  |
| 59                                                                           | Dieldrin                                   | 0.71  | 0.00 | 0.18 | 0.12 | 1.247 | 1.29  |
| 60                                                                           | Methoxychlor                               | 0.49  | 0.15 | 0.24 | 0.38 | 0.293 | 1.13  |
| 61                                                                           | o,p'-DDT                                   | 0.37  | 5.39 | 5.63 | 0.12 | 0.28  | 0.16  |
| 62                                                                           | Endosulfan                                 | 1.39  | 0.81 | 0.55 | 0.12 | 0.970 | 0.80  |
| 63                                                                           | beta-Hexachlorocyclohexane ( $\beta$ -HCH) | 1.90  | 0.20 | 0.23 | 0.10 | 1.470 | 0.24  |
| 64                                                                           | $\alpha$ -Endosulfan                       | 0.30  | 0.57 | 0.43 | 0.22 | 0.184 | 1.35  |
| 65                                                                           | Lindane (gamma-hexachlorocyclohexane)      | 1.03  | 0.02 | 0.24 | 0.09 | 0.734 | 0.373 |
| 66                                                                           | Indoxacarb                                 | 1.08  | 1.05 | 0.43 | 0.12 | 0.264 | 4.16  |
| 67                                                                           | Fipronil                                   | 4.12  | 0.46 | 0.29 | 0.13 | 0.98  | 1.00  |
| 68                                                                           | Pirimiphos-methyl                          | 0.11  | 1.09 | 0.19 | 0.30 | 0.138 | 0.063 |
| 69                                                                           | Cypermethrin                               | 0.23  | 0.12 | 0.33 | 0.11 | 1.018 | 0.87  |
| 70                                                                           | Cyphenothrin                               | 2.23  | 2.34 | 0.41 | 1.14 | 0.035 | 1.71  |
| 71                                                                           | Deltamethrin                               | 0.02  | 0.90 | 0.40 | 1.76 | 0.135 | 0.80  |
| 72                                                                           | Lambda-Cyhalothrin                         | 0.31  | 0.08 | 0.06 | 0.14 | 0.057 | 1.02  |
| 73                                                                           | Emamectin-benzoate                         | 3.31  | 3.40 | 6.11 | 1.35 | 0.901 | 13.67 |
| 74                                                                           | Bifenthrin                                 | 0.59  | 1.69 | 1.07 | 0.20 | 0.209 | 0.92  |
| 75                                                                           | Metalddehyde                               | 1.99  | 0.71 | 0.22 | 1.78 | 1.965 | 0.24  |
| 76                                                                           | Brodifacoum                                | 0.93  | 1.49 | 0.64 | 2.59 | 0.353 | 5.85  |
| <b>CATEGORY 4 (Partial data; low data reliability) – 3.6 % of pesticides</b> |                                            |       |      |      |      |       |       |
| 1                                                                            | Glufosinate                                | 11.08 | 1.75 | 3.45 | 0.97 |       | 2.04  |
| 2                                                                            | Thifensulfuron                             |       |      |      | 0.52 |       |       |
| 3                                                                            | Metsulfuron-methyl                         | 12.95 | 3.29 | 0.56 | 0.32 | 0.35  |       |
| 4                                                                            | $\beta$ -Endosulfan                        | 1.47  | 1.92 | 0.40 |      | 1.29  | 2.04  |

**Table S3: Complete QSAR predictions showing predictions “(x)” that were excluded from CPV calculations**

“(x)” following numbers are flagged because they either (1) do not meet our diagnostic inclusion criteria (molar mass > thresholds; 4 or more of the Abraham solute as “structural outliers”), (2) exceed the plausible theoretical upper limit values (19.3 for log K<sub>OW</sub>, 22.3 for log K<sub>OA</sub>, 16.6 for log K<sub>AW</sub>, 5.0 for log V<sub>p</sub>, and 1.4 for log S<sub>w</sub> – see Table 1 of Brown et al. 2025<sup>3</sup>), or (3) are PPLFER logK<sub>OC</sub> predictions for chemicals predominantly ionized at a neutral pH (i.e., the neutral fraction <50%) (PPLFER is not suited for ionized chemicals).

| Name                    | MW<br>(g/mol) | logKOW |          |           |        | logKOA |          |           |          | logKOC |           |         | logKAW |           |           |        | pKa                     |                         | Species<br>distribution |         |        |
|-------------------------|---------------|--------|----------|-----------|--------|--------|----------|-----------|----------|--------|-----------|---------|--------|-----------|-----------|--------|-------------------------|-------------------------|-------------------------|---------|--------|
|                         | OPERA         | OPERA  | IFS-QSAR | EPI Suite | PPLFER | OPERA  | IFS-QSAR | EPI Suite | PPLFER   | OPERA  | EPI Suite | PPLFER  | OPERA  | IFS-QSAR  | EPI Suite | PPLFER | pKa <sub>a, OPERA</sub> | pKa <sub>b, OPERA</sub> | Neutral%                | Cation% | Anion% |
| Abamectin               | 1732          | 4.70   | 6.78 (x) | 4.39 (x)  | 7.97   | 9.62   | 42.5 (x) | 11.6 (x)  | 42.2 (x) | 4.94   | 5.94(x)   | 2.85(x) | -3.73  | -35.2 (x) | -25.3 (x) | -36.4  | 7.16                    |                         | 37%                     | 0%      | 63%    |
| Hexythiazox             | 353           | 3.35   | 6.66     | 5.57      | 6.81   | 10.3   | 14.1     | 11.6      | 14.0     | 3.79   | 3.33      | 5.60    | -5.67  | -7.34     | -7.03     | -7.55  | 8.57                    |                         | 94%                     | 0%      | 6%     |
| monocrotophos           | 223           | -0.20  | 0.60     | -0.31     | 0.69   | 8.58   | 8.30     | 10.4      | 8.43     | 0.01   | 1.24      | -0.10   | -10.6  | -8.24     | -10.7     | -8.48  |                         | 6.89                    | 76%                     | 24%     | 0%     |
| Methiocarb              | 225           | 2.92   | 2.23     | 2.87      | 2.33   | 9.54   | 9.69     | 10.2      | 9.66     | 2.32   | 2.43      | 1.48(x) | -7.31  | -7.74     | -7.33     | -7.92  | 6.65                    |                         | 15%                     | 0%      | 85%    |
| Triazophos              | 313           | 3.34   | 2.73 (x) | 3.37      | 2.30   | 10.1   | 11.9 (x) | 9.24      | 10.7     | 2.21   | 3.27      | 1.47    | -5.70  | -9.58 (x) | -8.50     | -9.20  |                         | 1.95                    | 100%                    | 0%      | 0%     |
| Dimethomorph            | 388           | 2.68   | 3.86 (x) | 2.36      | 4.02   | 11.7   | 15.3 (x) | 11.2      | 15.1     | 3.41   | 3.76      | 3.05(x) | -8.08  | -11.8 (x) | -13.4     | -12.1  |                         | 8.27                    | 12%                     | 88%     | 0%     |
| Mefenoxam (Metalaxyl-M) | 279           | 1.65   | 1.76     | 1.70      | 1.94   | 9.84   | 10.9     | 8.63      | 10.8     | 1.57   | 1.59      | 0.78    | -8.02  | -9.49     | -7.48     | -9.72  |                         | 3.57                    | 100%                    | 0%      | 0%     |
| Metalaxyl               | 279           | 1.65   | 1.76     | 1.70      | 1.94   | 9.84   | 10.9     | 8.63      | 10.8     | 1.57   | 1.59      | 0.78    | -8.02  | -9.49     | -7.48     | -9.72  |                         | 3.57                    | 100%                    | 0%      | 0%     |
| Pyrimethanil            | 199           | 2.84   | 2.71     | 3.19      | 2.90   | 10.4   | 8.41     | 8.68      | 8.31     | 2.87   | 2.73      | 1.97    | -5.84  | -5.71     | -4.00     | -5.86  |                         | 5.09                    | 100%                    | 0%      | 0%     |
| Azoxystrobin            | 403           | 2.50   | 2.58     | 1.58      | 2.98   | 11.7   | 16.4     | 14.0      | 16.2     | 3.74   | 3.45      | 1.88    | -11.5  | -14.1     | -11.5     | -14.5  |                         | 1.24                    | 100%                    | 0%      | 0%     |
| Epoxiconazole           | 330           | 3.44   | 3.92 (x) | 3.47      | 3.22   | 10.2   | 13.1 (x) | 11.2      | 11.1     | 2.48   | 4.36      | 2.33    | -7.32  | -9.34 (x) | -7.79     | -8.55  |                         | 2.88                    | 100%                    | 0%      | 0%     |
| Thiabendazole           | 201           | 2.47   | 2.46     | 2.00      | 2.52   | 10.1   | 10.5     | 11.5      | 10.4     | 3.24   | 3.62      | 2.28    | -4.45  | -8.29     | -9.09     | -8.39  |                         | 5.00                    | 100%                    | 0%      | 0%     |

<sup>3</sup> Brown, T. N., Sangion, A., Li, L., & Arnot, J. A. (2025). Quantifying uncertainty in predicted chemical partition ratios required for chemical assessments. *Environmental Science: Processes & Impacts*, 27(11), 3457–3470. <https://doi.org/10.1039/D5EM00357A>

|                    |     |      |           |      |       |      |          |      |      |      |      |           |       |           |       |       |      |      |      |     |      |
|--------------------|-----|------|-----------|------|-------|------|----------|------|------|------|------|-----------|-------|-----------|-------|-------|------|------|------|-----|------|
| Carbendazim        | 191 | 1.52 | 1.35      | 1.55 | 1.48  | 8.41 | 10.3     | 10.6 | 10.2 | 2.35 | 2.58 | 1.02      | -9.13 | -9.17     | -10.2 | -9.30 | 9.94 | 1.26 | 100% | 0%  | 0%   |
| Bitertanol         | 337 | 4.16 | 4.14      | 4.07 | 4.45  | 10.7 | 13.8     | 15.1 | 13.7 | 2.90 | 3.63 | 3.14      | -9.13 | -9.71     | -10.2 | -10.0 | 11.7 |      | 100% | 0%  | 0%   |
| Benalaxyl          | 325 | 3.40 | 4.38      | 3.69 | 4.31  | 11.5 | 11.0     | 8.72 | 10.8 | 3.54 | 3.51 | 2.84      | -6.24 | -7.00     | -7.50 | -7.14 |      | 2.53 | 100% | 0%  | 0%   |
| Difenoconazole     | 406 | 4.30 | 4.28 (x)  | 5.20 | 3.37  | 11.7 | 16.2 (x) | 13.7 | 13.8 | 3.60 | 3.77 | 2.55      | -4.59 | -12.3 (x) | -9.16 | -11.4 | 8.49 | 3.56 | 92%  | 0%  | 8%   |
| Mancozeb           | 271 | 0.53 | -0.78 (x) | 0.62 | -0.65 | 7.94 | 10.7 (x) | 8.03 | 10.5 | 2.71 | 2.78 | -0.48 (x) | -7.60 | -12.1 (x) |       | -12.3 | 1.93 |      | 0%   | 0%  | 100% |
| Iprodione          | 330 | 3.00 | 4.38      | 2.85 | 4.48  | 10.3 | 13.3     | 9.89 | 13.2 | 2.85 | 1.72 | 3.83(x)   | -6.90 | -9.08     | -11.4 | -9.25 | 5.88 | 1.95 | 3%   | 0%  | 97%  |
| Prochloraz         | 377 | 4.10 | 2.44      | 4.13 | 2.28  | 11.8 | 13.6     | 10.3 | 12.9 | 2.70 | 3.38 | 1.40      | -6.18 | -11.7     | -9.51 | -11.6 |      | 3.63 | 100% | 0%  | 0%   |
| Imazalil           | 297 | 3.82 | 2.99      | 4.10 | 3.10  | 9.84 | 10.9     | 10.8 | 10.8 | 3.73 | 3.93 | 2.22(x)   | -7.16 | -8.18     | -5.53 | -8.35 |      | 8.12 | 16%  | 84% | 0%   |
| Maneb              | 265 | 0.79 | -0.78 (x) | 0.62 | -0.65 | 7.94 | 10.7 (x) | 8.03 | 10.5 | 2.71 | 2.78 | -0.48 (x) | -7.60 | -12.1 (x) |       | -12.3 | 1.93 |      | 0%   | 0%  | 100% |
| Fenpropimorph      | 303 | 4.93 | 4.17      | 5.50 | 4.37  | 8.85 | 10.3     | 8.93 | 10.1 | 3.20 | 4.43 | 2.14      | -4.59 | -6.06     | -5.06 | -6.31 |      | 7.08 | 68%  | 32% | 0%   |
| Chlorothalonil     | 266 | 2.98 | 3.36      | 3.66 | 3.18  | 8.49 | 8.03     | 7.89 | 8.26 | 3.26 | 3.02 | 2.92      | -4.09 | -4.98     | -5.21 | -5.46 |      |      | 100% | 0%  | 0%   |
| Hexachlorobenzene  | 285 | 5.73 | 5.56      | 5.86 | 5.62  | 7.37 | 7.05     | 7.36 | 7.00 | 3.74 | 3.79 | 4.78      | -1.16 | -1.26     | -1.44 | -1.31 |      |      | 100% | 0%  | 0%   |
| Captan             | 301 | 2.80 | 1.07 (x)  | 2.74 | 0.91  | 8.83 | 10.3 (x) | 9.34 | 9.77 | 2.30 | 2.40 | 0.50      | -6.57 | -9.83 (x) | -6.73 | -9.74 |      | 2.07 | 100% | 0%  | 0%   |
| Boscalid           | 343 | 2.96 | 4.90      | 4.00 | 5.06  | 10.3 | 14.5     | 12.7 | 14.3 | 3.19 | 3.98 | 4.09      | -7.90 | -9.61     | -9.76 | -9.84 |      | 2.03 | 100% | 0%  | 0%   |
| Spiroxamine        | 298 | 2.43 | 4.74 (x)  | 5.51 | 4.69  | 8.97 | 10.1 (x) | 10.9 | 9.88 | 3.24 | 3.37 | 2.91(x)   | -5.81 | -5.55 (x) | -5.10 | -5.69 |      | 8.97 | 3%   | 97% | 0%   |
| Pyraclostrobin     | 388 | 3.99 | 4.24 (x)  | 5.45 | 4.57  | 11.7 | 15.3 (x) | 12.7 | 15.2 | 3.21 | 4.68 | 3.55      | -8.67 | -11.1 (x) | -13.3 | -11.5 |      | 5.39 | 99%  | 1%  | 0%   |
| Trifloxystrobin    | 408 | 4.50 | 6.13 (x)  | 6.62 | 6.24  | 9.58 | 12.4 (x) | 10.5 | 12.3 | 4.52 | 6.48 | 4.34      | -7.82 | -6.06 (x) | -5.36 | -6.49 |      | 5.50 | 99%  | 1%  | 0%   |
| Thiophanate-methyl | 342 | 1.40 | 2.00 (x)  | 1.10 | 2.39  | 9.42 | 13.1 (x) | 8.71 | 13.0 | 3.25 | 2.52 | 1.30      | -7.49 | -11.2 (x) | -10.9 | -11.5 | 9.34 |      | 99%  | 0%  | 1%   |
| Fenbuconazole      | 337 | 3.23 | 4.24      | 4.23 | 3.84  | 10.1 | 13.5     | 8.70 | 12.6 | 2.95 | 4.84 | 3.05      | -7.91 | -9.74     | -8.21 | -9.49 |      | 0.06 | 100% | 0%  | 0%   |
| Propiconazole      | 342 | 3.72 | 3.83      | 4.13 | 3.91  | 10.2 | 13.2     | 10.9 | 13.1 | 3.39 | 3.19 | 3.32      | -7.43 | -9.74     | -7.26 | -9.93 |      | 3.33 | 100% | 0%  | 0%   |
| Triadimenol        | 296 | 2.90 | 3.30      | 2.95 | 3.44  | 10.2 | 12.3     | 13.4 | 12.1 | 2.70 | 2.29 | 2.39      | -8.85 | -9.13     | -9.19 | -9.33 | 10.2 |      | 100% | 0%  | 0%   |
| Tebuconazole       | 308 | 3.70 | 3.69      | 3.89 | 3.81  | 10.7 | 13.1     | 11.9 | 12.5 | 3.00 | 3.19 | 2.50      | -8.40 | -9.68     | -7.68 | -9.42 | 11.5 | 4.89 | 100% | 0%  | 0%   |
| Hexaconazole       | 314 | 3.90 | 4.05      | 3.66 | 4.16  | 10.7 | 13.1     | 10.8 | 13.0 | 2.52 | 3.06 | 3.16      | -6.88 | -9.24     | -8.05 | -9.43 | 8.46 |      | 92%  | 0%  | 8%   |
| Penconazole        | 284 | 3.71 | 4.27      | 4.67 | 3.87  | 8.62 | 10.5     | 10.9 | 9.45 | 2.96 | 3.93 | 2.96      | -6.52 | -6.41     | -3.74 | -6.05 |      | 1.85 | 100% | 0%  | 0%   |

|                                |     |       |           |       |       |      |          |      |       |      |      |         |       |           |       |       |       |       |      |     |      |
|--------------------------------|-----|-------|-----------|-------|-------|------|----------|------|-------|------|------|---------|-------|-----------|-------|-------|-------|-------|------|-----|------|
|                                |     |       |           |       |       |      |          |      |       |      |      |         |       |           |       |       |       |       | %    |     |      |
| Cymoxanil                      | 198 | 0.59  | 0.05 (x)  | 4.24  | 0.99  | 8.18 | 8.76 (x) | 8.46 | 9.02  | 2.09 | 1.15 | 0.37(x) | -7.84 | -9.03 (x) | -7.87 | -8.65 | 6.61  | 2.92  | 14%  | 0%  | 86%  |
| Thiram                         | 240 | 1.73  | 2.54 (x)  | 1.70  | 1.72  | 7.37 | 10.8 (x) | 6.86 | 8.66  | 2.83 | 2.79 | 1.19    | -4.88 | -8.52 (x) | -2.96 | -7.62 |       | 6.87  | 77%  | 23% | 0%   |
| Butachlor                      | 312 | 4.50  | 4.55      | 4.84  | 4.59  | 10.8 | 10.8     | 10.2 | 10.6  | 2.86 | 3.28 | 3.01    | -5.71 | -6.40     | -5.67 | -6.57 |       | 3.07  | 100% | 0%  | 0%   |
| Propanil                       | 218 | 3.07  | 3.16      | 2.88  | 3.14  | 9.10 | 9.18     | 10.2 | 9.06  | 2.17 | 2.25 | 2.44    | -6.29 | -6.19     | -6.74 | -6.26 | 10.1  |       | 100% | 0%  | 0%   |
| 2,4-Dichlorophenoxyacetic acid | 221 | 2.81  | 2.47      | 2.62  | 2.43  | 8.65 | 10.2     | 9.23 | 10.0  | 1.66 | 1.47 | 1.68(x) | -5.86 | -7.90     | -6.43 | -7.96 | 2.42  |       | 0%   | 0%  | 100% |
| Diuron                         | 233 | 2.68  | 2.91      | 2.67  | 2.89  | 9.96 | 10.6     | 10.4 | 10.5  | 2.40 | 2.04 | 2.15    | -7.68 | -7.93     | -7.66 | -8.01 | 10.7  |       | 100% | 0%  | 0%   |
| Bentazon                       | 240 | 2.34  | 3.53      | 1.67  | 3.59  | 9.81 | 9.70     | 9.39 | 9.59  | 1.53 | 1.00 | 2.87    | -7.30 | -6.27     | -8.09 | -6.37 | 7.67  |       | 65%  | 0%  | 35%  |
| Paraquat                       | 186 | 1.07  |           | -0.56 | 0.34  | 7.43 |          | 6.66 | -0.21 | 3.03 | 3.50 | 0.02    | -11.7 |           | -10.9 | 0.59  |       | 3.27  | 100% | 0%  | 0%   |
| Alachlor                       | 270 | 3.52  | 3.14      | 3.37  | 3.51  | 9.72 | 9.12     | 9.99 | 9.11  | 2.28 | 2.49 | 2.18    | -6.47 | -6.32     | -6.04 | -6.13 |       | 3.07  | 100% | 0%  | 0%   |
| Clethodim                      | 360 | 4.34  | 4.10      | 4.21  | 4.35  | 10.6 | 14.3     | 13.5 | 14.1  | 3.46 | 3.90 | 2.76    | -7.80 | -10.3     | -9.33 | -10.6 |       | -2.37 | 100% | 0%  | 0%   |
| Pendimethalin                  | 281 | 5.20  | 4.96      | 4.82  | 4.96  | 10.2 | 9.96     | 8.37 | 9.82  | 3.70 | 3.75 | 3.66    | -4.47 | -5.06     | -4.23 | -5.17 |       | 3.04  | 100% | 0%  | 0%   |
| Terbutylazine                  | 230 | 3.21  | 3.04      | 3.27  | 3.12  | 8.42 | 9.14     | 9.43 | 9.02  | 2.32 | 2.50 | 2.17    | -5.92 | -6.24     | -6.62 | -6.36 |       | 4.34  | 100% | 0%  | 0%   |
| Ametryn                        | 227 | 2.98  | 2.93      | 3.32  | 3.06  | 9.07 | 9.82     | 9.98 | 9.69  | 2.59 | 2.63 | 2.12    | -7.15 | -7.00     | -6.55 | -7.15 |       | 5.27  | 99%  | 1%  | 0%   |
| Glufosinate                    | 181 | 1.85  | -3.96 (x) | -4.49 | -4.07 | 8.32 | 13.3 (x) | 9.18 | 13.1  | 2.63 | 1.00 | -       | -8.46 | -18.4 (x) | -13.7 | -18.6 | -0.74 | 10.5  | 0%   | 0%  | 100% |
| Oxadiazon                      | 345 | 4.80  | 4.64 (x)  | 4.81  | 4.79  | 9.30 | 12.0 (x) | 10.3 | 11.9  | 3.51 | 3.70 | 3.65    | -5.18 | -7.45 (x) | -5.88 | -7.66 |       | 4.68  | 100% | 0%  | 0%   |
| Chlorotoluron                  | 213 | 2.41  | 2.58      | 2.58  | 2.56  | 9.81 | 10.0     | 10.6 | 9.86  | 2.02 | 2.04 | 1.76    | -8.23 | -7.68     | -7.49 | -7.76 | 11.0  |       | 100% | 0%  | 0%   |
| Linuron                        | 249 | 3.20  | 3.17      | 2.91  | 3.24  | 9.93 | 9.62     | 9.79 | 9.51  | 2.70 | 2.53 | 2.33    | -6.91 | -6.55     | -6.33 | -6.66 | 11.9  |       | 100% | 0%  | 0%   |
| Glyphosate                     | 169 | -3.39 | -2.28     | -4.77 | -2.33 | 8.40 | 13.6     | 4.67 | 13.4  | 3.32 | 0.00 | -       | -9.65 | -16.7     | -16.8 | -16.8 | -2.68 |       | 0%   | 0%  | 100% |
| Triclopyr                      | 256 | 8.98  | 2.72      | 2.53  | 2.79  | 8.87 | 10.1     | 9.93 | 9.98  | 1.67 | 1.72 | 1.94(x) | -6.42 | -7.45     | -6.68 | -7.56 | 2.08  |       | 0%   | 0%  | 100% |
| Tebuthiuron                    | 228 | 1.79  | 1.47      | 1.78  | 1.61  | 10.2 | 10.5     | 10.1 | 10.3  | 1.83 | 1.63 | 0.91    | -8.30 | -9.32     | -9.56 | -9.49 | 8.46  |       | 92%  | 0%  | 8%   |
| Thifensulfuron                 | 373 | 1.03  | 0.20 (x)  | 1.32  | 0.47  | 9.36 | 18.0 (x) | 15.6 | 17.8  | 1.67 | 1.10 | -       | -9.73 | -18.4 (x) | -14.3 | -18.7 | 1.22  |       | 0%   | 0%  | 100% |
| Metsulfuron-methyl             | 381 | 2.20  | 0.42 (x)  | 2.00  | 0.72  | 9.55 | 16.3 (x) | 16.5 | 16.1  | 1.54 | 1.97 | 0.17    | -14.4 | -16.5 (x) | -11.5 | -16.8 |       | 2.04  | 100% | 0%  | 0%   |

|                                         |     |       |           |       |       |      |          |      |      |      |      |          |       |           |           |       |      |      |      |    |      |
|-----------------------------------------|-----|-------|-----------|-------|-------|------|----------|------|------|------|------|----------|-------|-----------|-----------|-------|------|------|------|----|------|
| Nicosulfuron                            | 410 | 0.01  | -0.06 (x) | -1.15 | 0.19  | 9.62 | 18.5 (x) | 16.3 | 18.2 | 1.48 | 1.00 | -0.25    | -9.99 | -19.4 (x) | -16.2     | -19.7 |      | 5.65 | 98%  | 2% | 0%   |
| Atrazine                                | 216 | 2.61  | 2.16      | 2.82  | 2.26  | 8.38 | 9.07     | 9.58 | 8.94 | 2.24 | 2.35 | 1.46     | -6.92 | -7.10     | -6.74     | -7.23 |      | 3.79 | 100% | 0% | 0%   |
| Cyanazine                               | 241 | 2.22  | 1.64      | 2.51  | 1.67  | 9.10 | 10.7     | 12.2 | 10.6 | 2.28 | 2.13 | 1.12     | -7.61 | -9.55     | -10.1     | -9.67 |      | 1.49 | 100% | 0% | 0%   |
| Metribuzin                              | 214 | 1.70  | 1.75      | 1.49  | 1.97  | 7.51 | 11.1     | 10.0 | 11.0 | 1.71 | 1.73 | 0.88     | -8.20 | -9.43     | -10.1     | -9.62 |      | 1.08 | 100% | 0% | 0%   |
| Propazine                               | 230 | 2.93  | 2.60      | 3.24  | 2.71  | 8.41 | 9.39     | 9.66 | 9.26 | 2.40 | 2.54 | 1.80     | -7.12 | -6.95     | -6.62     | -7.09 |      | 3.93 | 100% | 0% | 0%   |
| Terbutryn                               | 241 | 3.56  | 3.59      | 3.77  | 3.71  | 9.12 | 9.95     | 9.80 | 9.83 | 2.85 | 2.78 | 2.64     | -6.23 | -6.42     | -6.43     | -6.58 |      | 5.62 | 98%  | 2% | 0%   |
| Simazine                                | 202 | 2.18  | 1.69      | 2.40  | 1.78  | 8.36 | 8.66     | 9.59 | 8.54 | 2.10 | 2.17 | 1.11     | -7.64 | -7.21     | -6.86     | -7.32 |      | 3.41 | 100% | 0% | 0%   |
| Isoproturon                             | 206 | 2.68  | 2.57      | 2.84  | 2.57  | 9.80 | 11.1     | 11.2 | 11.0 | 2.00 | 2.30 | 1.82     | -8.33 | -8.89     |           | -9.00 | 11.0 |      | 100% | 0% | 0%   |
| Chlorpyrifos                            | 351 | 4.96  | 5.24      | 5.11  | 4.86  | 10.6 | 8.96     | 8.88 | 9.83 | 3.70 | 3.86 | 3.49     | -3.92 | -3.77     | -3.99     | -5.34 |      | 2.03 | 100% | 0% | 0%   |
| Novaluron                               | 493 | 5.27  | 6.53 (x)  | 5.26  | 6.14  | 9.47 | 12.1 (x) | 15.8 | 11.9 | 4.10 | 3.58 | 4.50     | -9.37 | -5.52 (x) | -10.6 (x) | -6.10 | 12.4 |      | 100% | 0% | 0%   |
| Carbaryl (1-naphthyl N-methylcarbamate) | 201 | 2.36  | 2.02      | 2.35  | 2.36  | 9.13 | 8.72     | 9.23 | 9.26 | 2.40 | 2.55 | 1.81     | -6.85 | -6.93     | -6.89     | -7.42 | 8.14 |      | 85%  | 0% | 15%  |
| Carbofuran                              | 221 | 1.98  | 1.97      | 2.30  | 2.25  | 9.04 | 8.48     | 10.1 | 8.76 | 1.75 | 1.98 | 1.25(x)  | -7.69 | -6.81     | -7.18     | -7.05 | 6.88 |      | 23%  | 0% | 77%  |
| Fenoxycarb                              | 301 | 4.30  | 4.52      | 4.24  | 4.56  | 10.9 | 12.0     | 12.1 | 11.9 | 3.00 | 3.69 | 3.58     | -7.64 | -7.72     | -9.23     | -7.88 | 8.59 |      | 94%  | 0% | 6%   |
| Propoxur                                | 209 | 1.52  | 2.10      | 1.90  | -0.57 | 9.22 | 8.68     | 8.42 | 2.40 | 1.67 | 1.78 | -2.37(x) | -7.22 | -6.79     | -6.86     | -3.50 | 6.81 |      | 20%  | 0% | 80%  |
| Oxamyl                                  | 219 | -0.47 | -0.49     | -1.20 | -0.40 | 9.23 | 9.58     | 7.54 | 9.40 | 1.00 | 1.00 | -1.00(x) | -8.02 | -10.6     | -8.84     | -10.8 | 5.97 | 3.26 | 4%   | 0% | 96%  |
| Pirimicarb                              | 238 | 1.70  | 1.92      | 1.40  | 2.05  | 8.63 | 9.42     | 9.16 | 9.27 | 1.90 | 1.75 | 1.09     | -7.10 | -7.76     | -6.97     | -7.93 |      | 4.63 | 100% | 0% | 0%   |
| Tebufenozide                            | 352 | 4.25  | 6.34      | 4.62  | 5.70  | 10.4 | 15.1     | 10.5 | 13.4 | 3.28 | 3.49 | 4.00     | -7.57 | -8.82     | -8.45     | -8.28 | 9.81 |      | 100% | 0% | 0%   |
| Thiacloprid                             | 253 | 1.26  | 1.86      | 2.33  | 1.88  | 8.17 | 10.4     | 14.7 | 10.3 | 2.49 | 3.05 | 1.64     | -6.40 | -9.07     | -8.00     | -9.19 |      | 0.75 | 100% | 0% | 0%   |
| Thiamethoxam                            | 292 | -0.13 | 1.01      | 0.80  | 0.04  | 7.38 | 11.2     | 12.6 | 10.4 | 2.08 | 2.42 | -0.59(x) | -6.48 | -10.5     | -12.6     | -11.4 | 4.37 |      | 0%   | 0% | 100% |
| Acetamiprid                             | 223 | 1.83  | 1.82      | 2.55  | 1.78  | 6.88 | 9.51     | 8.10 | 9.36 | 2.08 | 2.70 | 1.47     | -7.00 | -8.21     | -5.55     | -8.29 |      | 2.50 | 100% | 0% | 0%   |
| Imidacloprid                            | 256 | 0.57  | 0.40      | 0.56  | 0.61  | 8.83 | 9.81     | 13.7 | 9.67 | 2.06 | 2.99 | 0.02     | -8.26 | -9.77     | -11.4     | -9.96 |      | 1.93 | 100% | 0% | 0%   |
| Aldrin                                  | 365 | 6.50  | 6.54      | 6.75  | 6.16  | 8.66 | 8.53     | 9.24 | 8.50 | 4.69 | 4.91 | 4.81     | -2.27 | -1.76     | -1.80     | -2.40 |      |      | 100% | 0% | 0%   |

|                                            |     |      |          |      |      |      |          |      |      |      |      |         |       |           |           |       |      |  |      |    |     |
|--------------------------------------------|-----|------|----------|------|------|------|----------|------|------|------|------|---------|-------|-----------|-----------|-------|------|--|------|----|-----|
| Dieldrin                                   | 381 | 5.12 | 5.77     | 5.45 | 5.18 | 8.56 | 9.33     | 8.59 | 10.2 | 4.08 | 4.30 | 4.23    | -3.47 | -3.54     | -4.66     | -5.29 |      |  | 100% | 0% | 0%  |
| Endrin                                     | 381 | 5.12 | 5.77     | 5.45 | 3.91 | 8.56 | 9.33     | 8.59 | 8.64 | 4.08 | 4.30 | 2.82    | -3.47 | -3.54     | -4.66     | -5.14 |      |  | 100% | 0% | 0%  |
| Heptachlor                                 | 373 | 6.10 | 5.79     | 5.86 | 5.98 | 7.77 | 9.33     | 7.39 | 9.26 | 4.38 | 4.62 | 4.75    | -1.92 | -3.25     | -2.14     | -3.40 |      |  | 100% | 0% | 0%  |
| Methoxychlor                               | 346 | 5.08 | 5.27     | 5.67 | 5.26 | 9.17 | 11.4     | 10.2 | 11.3 | 4.90 | 4.43 | 4.24    | -5.09 | -6.32     | -5.40     | -6.45 |      |  | 100% | 0% | 0%  |
| DDT (p,p'-DDT)                             | 354 | 6.79 | 6.69     | 6.79 | 6.96 | 9.57 | 10.0     | 10.4 | 9.88 | 5.10 | 5.23 | 5.83    | -3.47 | -3.31     | -3.21     | -2.99 |      |  | 100% | 0% | 0%  |
| o,p'-DDT                                   | 354 | 6.91 | 6.42     | 6.79 | 6.53 | 9.57 | 10.2     | 10.3 | 9.50 | 5.31 | 5.24 | 5.34    | -3.10 | -3.80     | -3.21     | -3.08 |      |  | 100% | 0% | 0%  |
| p,p'-DDD                                   | 320 | 6.13 | 6.48     | 5.87 | 6.46 | 10.0 | 9.94     | 9.59 | 9.83 | 4.21 | 5.07 | 5.44    | -3.57 | -3.40     | -2.75     | -3.48 |      |  | 100% | 0% | 0%  |
| p,p'-DDE                                   | 316 | 6.73 | 6.85     | 6.00 | 7.00 | 9.44 | 9.24     | 9.28 | 9.66 | 4.82 | 5.07 | 5.87    | -2.77 | -2.20     | -2.84     | -2.65 |      |  | 100% | 0% | 0%  |
| Endosulfan                                 | 407 | 3.83 | 5.08     | 3.50 | 5.12 | 8.81 | 9.52     | 6.41 | 9.41 | 4.11 | 3.83 | 3.97    | -3.28 | -4.45     | -5.43     | -4.57 |      |  | 100% | 0% | 0%  |
| beta-Hexachlorocyclohexane ( $\beta$ -HCH) | 288 | 3.72 | 3.90     | 4.26 | 3.75 | 8.09 | 7.96     | 7.82 | 7.63 | 3.17 | 3.45 | 2.79    | -3.88 | -3.95     | -1.98     | -4.16 |      |  | 100% | 0% | 0%  |
| $\alpha$ -Endosulfan                       | 407 | 3.83 | 5.08     | 3.50 | 4.85 | 8.81 | 9.52     | 6.41 | 10.0 | 4.11 | 3.83 | 3.60    | -3.28 | -4.45     |           | -5.56 |      |  | 100% | 0% | 0%  |
| $\beta$ -Endosulfan                        | 407 | 3.83 | 5.08     | 3.50 | 5.12 | 8.81 | 9.52     | 6.41 | 9.41 | 4.11 | 3.83 | 3.97    | -3.28 | -4.45     |           | -4.57 |      |  | 100% | 0% | 0%  |
| Lindane (gamma-hexachlorocyclohexane)      | 291 | 3.72 | 3.90     | 4.26 | 3.73 | 8.09 | 7.96     | 7.82 | 7.61 | 3.17 | 3.45 | 2.78    | -3.88 | -3.95     | -1.98     | -4.16 |      |  | 100% | 0% | 0%  |
| Diazinon                                   | 304 | 3.81 | 4.24     | 3.86 | 4.11 | 9.83 | 9.06     | 9.14 | 8.69 | 2.75 | 3.48 | 2.35    | -5.33 | -4.95     | -5.45     | -5.01 | 3.55 |  | 100% | 0% | 0%  |
| Dimethoate                                 | 229 | 0.78 | 0.90     | 0.72 | 0.94 | 9.92 | 9.42     | 8.78 | 9.26 | 1.20 | 1.11 | 0.30    | -7.33 | -8.95     | -9.07     | -9.06 | 2.45 |  | 100% | 0% | 0%  |
| Malathion                                  | 330 | 2.36 | 2.95     | 2.29 | 2.83 | 9.61 | 9.43     | 9.06 | 9.21 | 2.36 | 1.50 | 1.55    | -6.70 | -6.96     | -7.47     | -7.06 |      |  | 100% | 0% | 0%  |
| Ethoprophos                                | 242 | 3.59 | 2.96     | 3.14 | 2.98 | 8.64 | 7.76     | 8.77 | 7.64 | 1.85 | 2.33 | 1.76    | -5.18 | -5.01     | -4.90     | -5.13 |      |  | 100% | 0% | 0%  |
| Indoxacarb                                 | 528 | 4.65 | 3.40 (x) | 4.60 | 3.42 | 11.7 | 19.1 (x) | 12.2 | 18.9 | 3.64 | 3.91 | 2.86(x) | -7.33 | -16.3 (x) | -11.0 (x) | -16.8 | 6.61 |  | 14%  | 0% | 86% |
| Fipronil                                   | 437 | 4.00 | 2.20     | 6.64 | 2.01 | 10.5 | 15.2     | 11.5 | 15.0 | 2.61 | 3.77 | 1.71(x) | -7.25 | -13.6     | -15.9     | -14.1 | 7.36 |  | 48%  | 0% | 52% |
| Pirimiphos-methyl                          | 305 | 4.20 | 3.90     | 4.00 | 3.95 | 10.8 | 9.60     | 8.81 | 9.44 | 3.00 | 2.57 | 2.52    | -5.27 | -5.85     | -3.99     | -6.00 | 3.97 |  | 100% | 0% | 0%  |
| Cypermethrin                               | 416 | 6.60 | 7.05 (x) | 6.38 | 6.85 | 11.7 | 12.9 (x) | 11.7 | 14.5 | 5.00 | 4.90 | 5.44    | -4.81 | -6.12 (x) | -4.49     | -8.19 |      |  | 100% | 0% | 0%  |
| Cyphenothrin                               | 375 | 6.29 | 7.44 (x) | 6.49 | 7.32 | 11.8 | 12.2 (x) | 10.3 | 12.0 | 4.82 | 4.90 | 5.59    | -5.48 | -4.88 (x) | -3.82     | -5.02 |      |  | 100% | 0% | 0%  |

|                    |      |      |          |          |       |      |          |          |          |      |         |         |       |           |           |       |      |  |       |    |     |
|--------------------|------|------|----------|----------|-------|------|----------|----------|----------|------|---------|---------|-------|-----------|-----------|-------|------|--|-------|----|-----|
| Deltamethrin       | 505  | 6.20 | 7.52 (x) | 6.18     | 7.43  | 11.7 | 14.0 (x) | 9.89     | 13.8     | 4.79 | 4.90    | 6.04    | -3.71 | -6.63 (x) | -5.61 (x) | -6.79 |      |  | 100 % | 0% | 0%  |
| Lambda-Cyhalothrin | 450  | 6.80 | 7.30 (x) | 6.85     | 7.18  | 11.7 | 11.9 (x) | 11.2     | 11.9     | 5.26 | 5.53    | 5.41    | -6.42 | -4.91 (x) | -3.26     | -5.13 |      |  | 100 % | 0% | 0%  |
| Emamectin-benzoate | 2003 | 1.87 | 7.59 (x) | 5.38 (x) | 8.81  | 9.62 | 42.1 (x) | 12.2 (x) | 41.8 (x) | 4.94 | 6.46(x) | 3.51    | -3.68 | -33.9 (x) |           | -35.1 | 7.47 |  | 54%   | 0% | 46% |
| Bifenthrin         | 423  | 6.00 | 7.16     | 8.15     | 6.98  | 10.5 | 11.3     | 12.5     | 11.1     | 5.35 | 6.36    | 4.94    | -3.34 | -4.17     | -3.11     | -4.48 |      |  | 100 % | 0% | 0%  |
| Cadusafos          | 270  | 3.90 | 3.22 (x) | 3.98     | 3.22  | 8.53 | 8.62 (x) | 8.18     | 8.44     | 2.60 | 2.74    | 1.76    | -4.28 | -5.63 (x) | -4.65     | -5.76 |      |  | 100 % | 0% | 0%  |
| Metaldehyde        | 176  | 0.12 | -0.59    | 0.85     | -0.36 | 4.31 | 5.74     | 2.89     | 5.59     | 2.38 | 1.00    | -1.58   | -2.77 | -6.52     | -6.54     | -6.68 |      |  | 100 % | 0% | 0%  |
| Fenamiphos         | 303  | 3.23 | 3.00     | 3.29     | 3.10  | 11.2 | 11.1     | 10.7     | 11.0     | 2.51 | 2.60    | 1.75(x) | -6.92 | -8.39     | -8.40     | -8.58 | 6.33 |  | 8%    | 0% | 92% |
| Brodifacoum        | 523  | 6.16 | 8.71     | 7.62     | 8.97  | 11.7 | 20.3     | 19.2     | 20.2     | 5.08 | 6.89    | 7.69    | -6.39 | -11.5     | -10.7 (x) | -11.9 |      |  | 100 % | 0% | 0%  |

**Table S4: Predicted exposure indices, Drinking Water Exposure Potential (DWE<sub>P</sub>) and intake fractions (*iF*), based on four scenarios representing predicted and empirical pesticide partitioning and reactivity data**

| Pesticide Active Ingredient    | DWE <sub>P</sub> |            |            |            | <i>iF</i>  |            |            |            |
|--------------------------------|------------------|------------|------------|------------|------------|------------|------------|------------|
|                                | Scenario 1       | Scenario 2 | Scenario 3 | Scenario 4 | Scenario 1 | Scenario 2 | Scenario 3 | Scenario 4 |
| 2,4-Dichlorophenoxyacetic acid | 5.71E-12         | 1.24E-12   | 6.16E-12   | 1.19E-12   | 5.75E-15   | 1.25E-15   | 6.19E-15   | 1.20E-15   |
| Acetamiprid                    | 8.49E-11         | 5.61E-13   | 3.80E-11   | 4.82E-13   | 8.54E-14   | 5.65E-16   | 3.82E-14   | 4.85E-16   |
| Alachlor                       | 3.29E-11         | 1.19E-11   | 3.88E-11   | 4.76E-11   | 3.31E-14   | 1.20E-14   | 3.90E-14   | 4.79E-14   |
| Ametryn                        | 4.58E-11         | 4.56E-11   | 5.06E-11   | 6.91E-11   | 4.61E-14   | 4.59E-14   | 5.09E-14   | 6.95E-14   |
| Atrazine                       | 1.99E-10         | 8.98E-11   | 2.28E-10   | 7.12E-11   | 2.01E-13   | 9.03E-14   | 2.29E-13   | 7.17E-14   |
| Azoxystrobin                   | 8.53E-12         | 2.89E-11   | 8.64E-12   | 2.88E-11   | 8.58E-15   | 2.90E-14   | 8.69E-15   | 2.90E-14   |
| Benalaxyl                      | 5.25E-12         | 4.36E-11   | 5.15E-12   | 3.34E-11   | 5.28E-15   | 4.38E-14   | 5.18E-15   | 3.36E-14   |
| Bentazon                       | 2.02E-11         | 1.74E-11   | 1.80E-11   | 3.11E-11   | 2.03E-14   | 1.75E-14   | 1.81E-14   | 3.13E-14   |
| Bifenthrin                     | 9.42E-12         | 3.74E-12   | 1.15E-11   | 1.53E-11   | 9.48E-15   | 3.76E-15   | 1.15E-14   | 1.54E-14   |
| Captan                         | 1.91E-10         | 1.47E-13   | 4.39E-11   | 1.63E-13   | 1.92E-13   | 1.48E-16   | 4.42E-14   | 1.64E-16   |
| Carbaryl                       | 3.06E-11         | 1.48E-11   | 4.12E-11   | 9.50E-12   | 3.07E-14   | 1.48E-14   | 4.14E-14   | 9.55E-15   |
| Chlorothalonil                 | 9.34E-10         | 7.03E-12   | 9.25E-10   | 7.22E-12   | 9.40E-13   | 7.07E-15   | 9.31E-13   | 7.26E-15   |
| Cyanazine                      | 7.58E-11         | 6.87E-12   | 6.98E-11   | 5.93E-12   | 7.63E-14   | 6.91E-15   | 7.03E-14   | 5.96E-15   |
| Cypermethrin                   | 1.44E-11         | 2.53E-12   | 1.49E-11   | 7.01E-12   | 1.44E-14   | 2.54E-15   | 1.49E-14   | 7.06E-15   |
| Deltamethrin                   | 2.32E-12         | 1.91E-12   | 2.46E-12   | 2.97E-12   | 2.33E-15   | 1.92E-15   | 2.47E-15   | 2.98E-15   |
| Diazinon                       | 4.08E-12         | 1.31E-12   | 3.98E-12   | 2.07E-12   | 4.10E-15   | 1.32E-15   | 4.01E-15   | 2.09E-15   |
| Dieldrin                       | 9.17E-10         | 2.87E-10   | 3.34E-10   | 6.02E-13   | 9.22E-13   | 2.88E-13   | 3.36E-13   | 6.05E-16   |
| Diuron                         | 4.41E-11         | 1.63E-10   | 3.76E-11   | 5.93E-11   | 4.43E-14   | 1.64E-13   | 3.78E-14   | 5.96E-14   |
| Endosulfan                     | 7.76E-10         | 9.13E-11   | 6.79E-10   | 3.58E-11   | 7.81E-13   | 9.18E-14   | 6.83E-13   | 3.60E-14   |
| Ethoprophos                    | 1.30E-11         | 8.78E-12   | 1.51E-11   | 1.38E-11   | 1.31E-14   | 8.83E-15   | 1.52E-14   | 1.39E-14   |
| Fenamiphos                     | 1.19E-11         | 2.01E-13   | 1.19E-11   | 2.33E-13   | 1.20E-14   | 2.03E-16   | 1.20E-14   | 2.34E-16   |
| Glyphosate                     | 1.58E-12         | 7.09E-15   | 1.56E-12   | 7.57E-15   | 1.59E-15   | 7.13E-18   | 1.57E-15   | 7.61E-18   |
| Indoxacarb                     | 1.14E-10         | 3.52E-11   | 1.16E-10   | 3.54E-11   | 1.14E-13   | 3.54E-14   | 1.17E-13   | 3.56E-14   |

|                    |          |          |          |          |          |          |          |          |
|--------------------|----------|----------|----------|----------|----------|----------|----------|----------|
| Iprodione          | 3.75E-11 | 8.43E-12 | 3.71E-11 | 8.37E-12 | 3.77E-14 | 8.48E-15 | 3.73E-14 | 8.42E-15 |
| Lambda-Cyhalothrin | 3.40E-12 | 4.27E-12 | 3.57E-12 | 5.41E-12 | 3.42E-15 | 4.29E-15 | 3.60E-15 | 5.44E-15 |
| Lindane            | 3.17E-10 | 1.43E-09 | 4.95E-10 | 4.11E-10 | 3.19E-13 | 1.44E-12 | 4.98E-13 | 4.14E-13 |
| Linuron            | 1.09E-10 | 6.72E-11 | 1.11E-10 | 5.33E-11 | 1.09E-13 | 6.76E-14 | 1.12E-13 | 5.36E-14 |
| Malathion          | 1.95E-12 | 3.86E-14 | 1.76E-12 | 3.79E-14 | 1.96E-15 | 3.88E-17 | 1.77E-15 | 3.81E-17 |
| Metalaxyl          | 6.62E-12 | 3.60E-12 | 6.07E-12 | 2.33E-12 | 6.66E-15 | 3.63E-15 | 6.11E-15 | 2.35E-15 |
| Metaldehyde        | 1.98E-10 | 3.67E-12 | 2.04E-10 | 4.80E-12 | 1.99E-13 | 3.69E-15 | 2.06E-13 | 4.83E-15 |
| Nicosulfuron       | 1.17E-11 | 6.51E-12 | 1.36E-11 | 2.78E-11 | 1.18E-14 | 6.55E-15 | 1.37E-14 | 2.79E-14 |
| Novaluron          | 1.42E-10 | 3.63E-12 | 1.59E-10 | 7.94E-12 | 1.43E-13 | 3.65E-15 | 1.60E-13 | 7.99E-15 |
| Oxadiazon          | 5.30E-11 | 4.44E-10 | 4.92E-11 | 3.46E-10 | 5.33E-14 | 4.46E-13 | 4.94E-14 | 3.48E-13 |
| Oxamyl             | 6.05E-12 | 3.34E-12 | 5.61E-12 | 1.66E-12 | 6.08E-15 | 3.36E-15 | 5.64E-15 | 1.67E-15 |
| Pendimethalin      | 2.24E-10 | 2.98E-11 | 2.18E-10 | 3.51E-11 | 2.25E-13 | 2.99E-14 | 2.19E-13 | 3.53E-14 |
| Pirimiphos-methyl  | 2.34E-11 | 6.31E-12 | 1.63E-11 | 5.77E-12 | 2.35E-14 | 6.34E-15 | 1.64E-14 | 5.80E-15 |
| Prochloraz         | 5.53E-11 | 1.49E-10 | 5.50E-11 | 2.51E-10 | 5.56E-14 | 1.50E-13 | 5.54E-14 | 2.52E-13 |
| Propanil           | 8.36E-11 | 1.32E-13 | 9.09E-11 | 1.41E-13 | 8.41E-14 | 1.33E-16 | 9.14E-14 | 1.42E-16 |
| Propoxur           | 6.22E-11 | 5.75E-11 | 2.72E-11 | 6.29E-11 | 6.25E-14 | 5.79E-14 | 2.73E-14 | 6.33E-14 |
| Pyraclostrobin     | 2.42E-11 | 6.77E-13 | 2.42E-11 | 7.09E-13 | 2.44E-14 | 6.81E-16 | 2.43E-14 | 7.13E-16 |
| Tebuthiuron        | 1.72E-11 | 4.20E-10 | 1.67E-11 | 1.03E-09 | 1.73E-14 | 4.22E-13 | 1.68E-14 | 1.04E-12 |
| Terbutryn          | 7.14E-11 | 4.89E-11 | 7.56E-11 | 4.83E-11 | 7.18E-14 | 4.92E-14 | 7.61E-14 | 4.86E-14 |
| Thiamethoxam       | 1.07E-11 | 2.78E-11 | 1.15E-11 | 2.69E-11 | 1.08E-14 | 2.79E-14 | 1.16E-14 | 2.71E-14 |
| Triazophos         | 5.21E-12 | 2.82E-11 | 6.10E-12 | 3.62E-11 | 5.25E-15 | 2.84E-14 | 6.13E-15 | 3.64E-14 |
| Triclopyr          | 1.48E-11 | 5.43E-12 | 1.55E-11 | 3.55E-14 | 1.49E-14 | 5.46E-15 | 1.56E-14 | 3.58E-17 |
